# Supplementary material
Source: MDPI journal article supplement (https://www.mdpi.com/2297-8739/10/4/252)
Supplement: s1 [file s1]

# Supporting Information

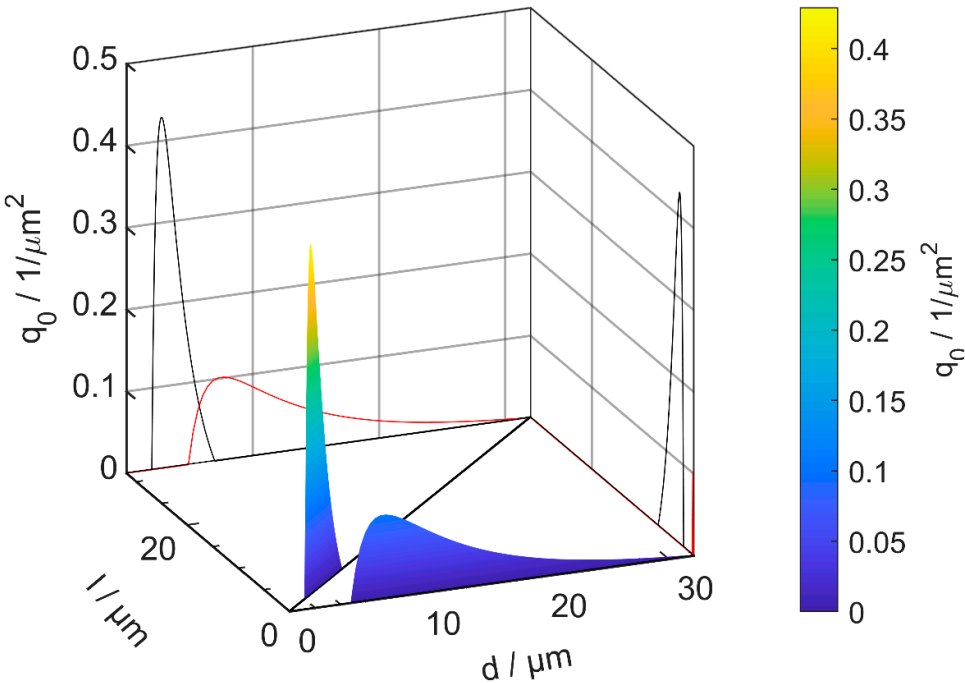

**Figure S1:** Number-weighted particle size distribution  $q_0$  of the sphere ( $l = d$ ) and the spheres deformed into cylinders with a thickness of  $0.2 \mu\text{m}$  shown in a 3D diagram

**Table S1:** Geometry of Rietema hydrocyclones [1]

| Geometry | $d_e/D_c$ | $d_o/D_c$ | $L/D_c$ | $l/D_c$ | alpha |
|----------|-----------|-----------|---------|---------|-------|
| Rietema  | 0.28      | 0.34      | 5.0     | 0.4     | 20    |

**Table S2:** Constants  $k$  and  $n$  for different hydrocyclone designs [2].

| Constant | Rietema |
|----------|---------|
| k1       | 0.0474  |
| k2       | 371.5   |
| k3       | 1218    |
| n1       | 0.74    |
| n2       | 9       |
| n3       | 0.12    |
| n4       | -2.12   |
| n5       | 4.75    |
| n6       | -0.3    |

**Table S3:** Material properties and geometrical data of the disc separator

|                              |      |
|------------------------------|------|
| $\rho_f$ / kg/m <sup>3</sup> | 997  |
| $\mu_f$ / mPas               | 1.01 |
| $n$ / 1/min                  | 2000 |
| $r_a$ / mm                   | 40   |
| $r_i$ / mm                   | 12   |
| $\dot{V}$ / l/min            | 200  |
| $N$ / -                      | 25   |
| $\alpha$ / °                 | 45   |

## References

- [1] K. Rietema, „Performance and design of hydrocyclones—III“, *Chemical Engineering Science*, Jg. 15, 3-4, S. 310–319, 1961, doi: 10.1016/0009-2509(61)85035-5.
- [2] L. R. Castilho und R. A. Medronho, „A simple procedure for design and performance prediction of Bradley and Rietema hydrocyclones“, *Minerals Engineering*, Jg. 13, Nr. 2, S. 183–191, 2000, doi: 10.1016/S0892-6875(99)00164-8.
